# Supplementary material
Source: PubMed Central journal article supplement (PMC2566190)
Supplement: supp_190_20_6646__1.pdf [file supp_190_20_6646__1.pdf]

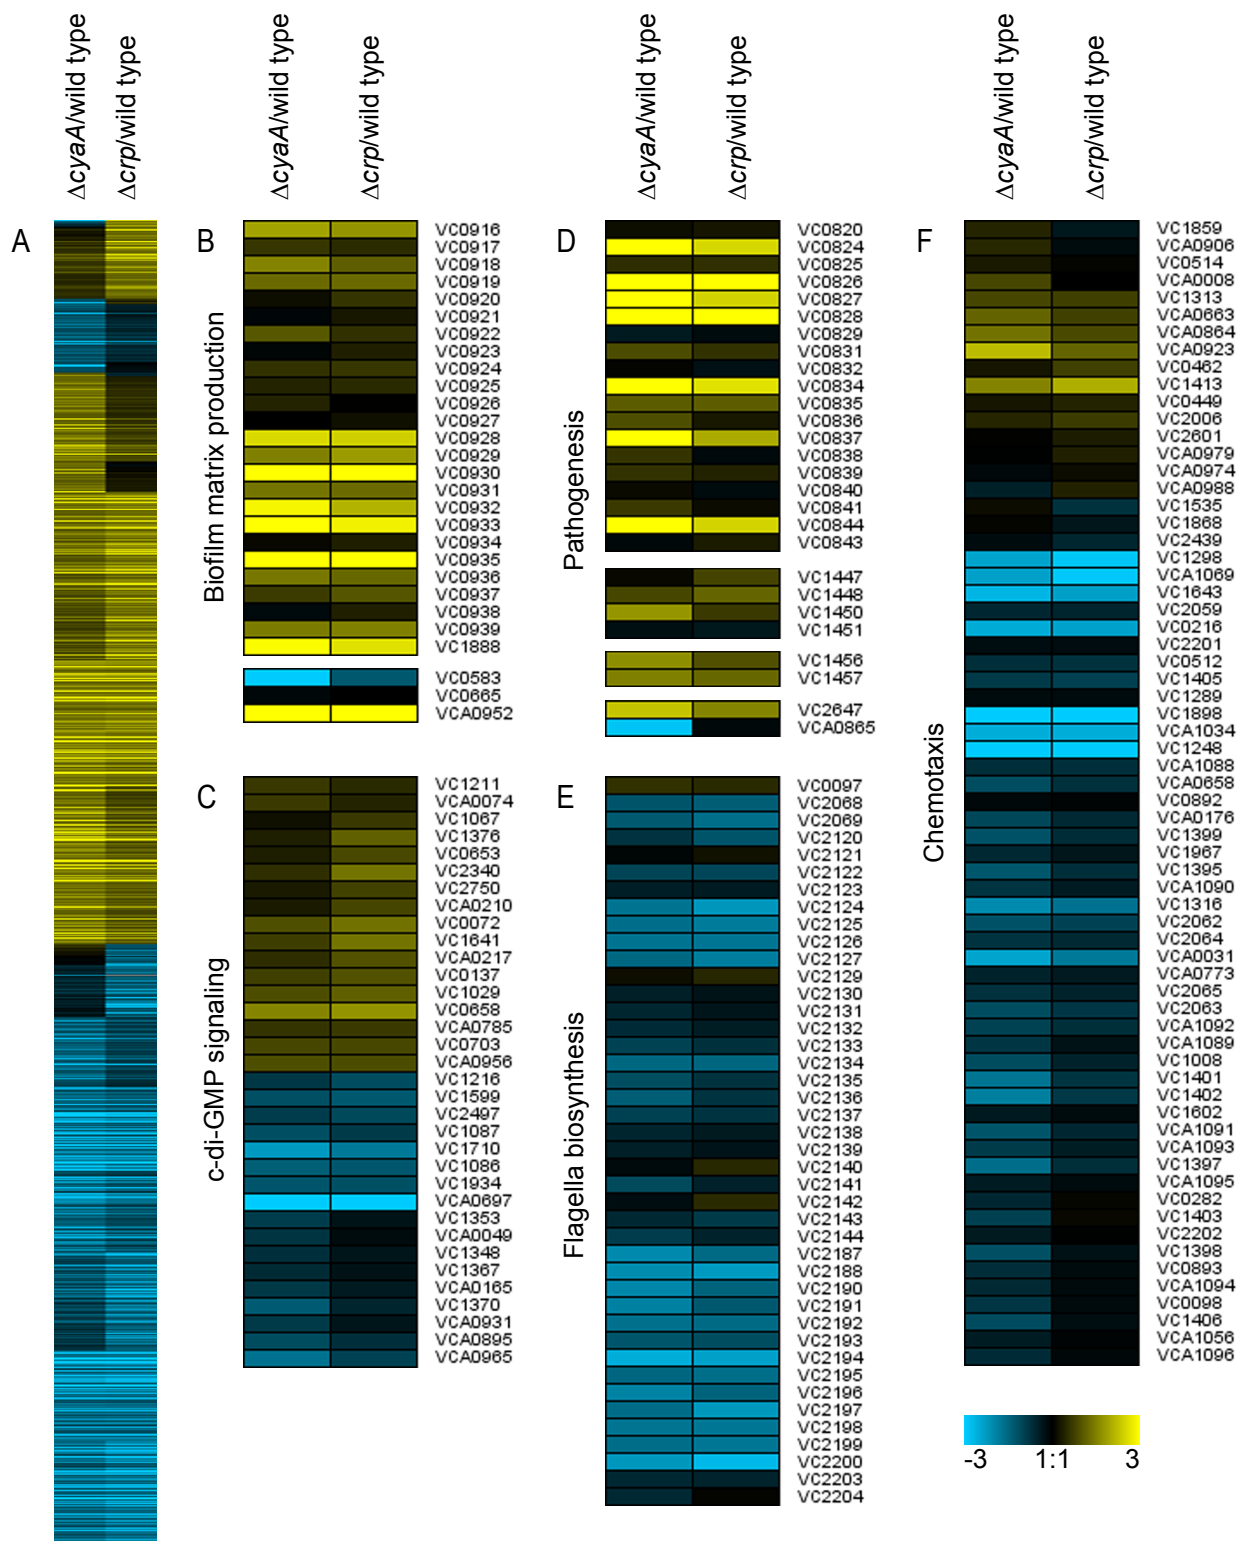

**Figure S1. Transcriptome analysis of cAMP-CRP regulation.**

(A) A compact view of all differentially-expressed genes in  $\Delta cyaA$  and  $\Delta crp$  relative to wild type. The expression profiles of (B) genes involved in biofilm matrix production, (C) genes encoding predicted DGEs and PDEs, (D) genes involved in pathogenesis, (E) flagella biosynthesis and (F) chemotaxis are also shown. Yellow represents induction and blue represents repression.



**Table S1.** Genes that are differentially expressed in  $\Delta$ *cyaA* relative to wild type. Differentially expressed genes were determined using SAM software with  $\geq 2.0$  fold change in gene expression and False Discovery Rate (FDR)  $\leq 1\%$  as a criteria.

| Gene ID | Fold Change |
|---------|-------------|
| VC0001  | 2.18        |
| VC0002  | 2.03        |
| VC0007  | 2.31        |
| VC0008  | 4.30        |
| VC0009  | 2.88        |
| VC0010  | 12.73       |
| VC0011  | 3.58        |
| VC0020  | 2.01        |
| VC0021  | 2.02        |
| VC0023  | 0.16        |
| VC0024  | 2.24        |
| VC0033  | 2.04        |
| VC0036  | 0.11        |
| VC0037  | 2.31        |
| VC0039  | 2.66        |
| VC0050  | 2.30        |
| VC0054  | 2.85        |
| VC0056  | 2.26        |
| VC0057  | 2.43        |
| VC0059  | 3.79        |
| VC0060  | 2.24        |
| VC0061  | 2.04        |
| VC0065  | 2.50        |
| VC0067  | 2.90        |
| VC0069  | 0.06        |
| VC0070  | 2.20        |
| VC0071  | 2.39        |
| VC0073  | 2.39        |
| VC0074  | 0.45        |
| VC0076  | 0.06        |
| VC0086  | 2.08        |
| VC0087  | 2.12        |
| VC0089  | 0.05        |
| VC0117  | 0.31        |
| VC0118  | 0.36        |
| VC0119  | 0.45        |
| VC0124  | 2.31        |
| VC0127  | 2.63        |
| VC0128  | 2.80        |
| VC0129  | 2.29        |
| VC0133  | 0.41        |
| VC0134  | 3.26        |
| VC0135  | 2.26        |

| Gene ID | Fold Change |
|---------|-------------|
| VC0136  | 2.70        |
| VC0142  | 0.23        |
| VC0146  | 0.39        |
| VC0151  | 0.47        |
| VC0156  | 2.47        |
| VC0159  | 0.35        |
| VC0162  | 0.36        |
| VC0168  | 0.33        |
| VC0176  | 0.45        |
| VC0177  | 0.10        |
| VC0186  | 2.25        |
| VC0187  | 2.17        |
| VC0190  | 2.01        |
| VC0191  | 3.09        |
| VC0195  | 2.82        |
| VC0196  | 3.45        |
| VC0197  | 3.75        |
| VC0210  | 2.39        |
| VC0215  | 2.78        |
| VC0216  | 0.17        |
| VC0218  | 2.36        |
| VC0219  | 2.56        |
| VC0227  | 2.15        |
| VC0228  | 3.51        |
| VC0232  | 2.07        |
| VC0238  | 2.17        |
| VC0240  | 2.77        |
| VC0268  | 2.51        |
| VC0278  | 2.66        |
| VC0290  | 2.31        |
| VC0291  | 3.50        |
| VC0292  | 2.66        |
| VC0298  | 0.30        |
| VC0299  | 0.20        |
| VC0300  | 0.18        |
| VC0303  | 0.47        |
| VC0313  | 3.36        |
| VC0325  | 2.15        |
| VC0330  | 0.45        |
| VC0335  | 2.07        |
| VC0341  | 2.76        |
| VC0359  | 2.30        |
| VC0360  | 2.13        |

| Gene ID | Fold Change |
|---------|-------------|
| VC0364  | 0.12        |
| VC0379  | 2.06        |
| VC0383  | 4.49        |
| VC0384  | 9.29        |
| VC0385  | 11.57       |
| VC0386  | 8.94        |
| VC0387  | 2.09        |
| VC0391  | 8.35        |
| VC0412  | 0.50        |
| VC0428  | 2.42        |
| VC0430  | 5.54        |
| VC0432  | 0.14        |
| VC0435  | 2.02        |
| VC0438  | 2.44        |
| VC0446  | 2.02        |
| VC0451  | 2.56        |
| VC0453  | 2.26        |
| VC0454  | 2.48        |
| VC0458  | 2.21        |
| VC0469  | 2.43        |
| VC0473  | 2.42        |
| VC0475  | 2.59        |
| VC0476  | 2.67        |
| VC0477  | 2.60        |
| VC0478  | 3.38        |
| VC0479  | 4.07        |
| VC0480  | 4.28        |
| VC0484  | 2.77        |
| VC0487  | 3.63        |
| VC0488  | 0.39        |
| VC0490  | 0.23        |
| VC0491  | 0.07        |
| VC0492  | 0.09        |
| VC0511  | 4.48        |
| VC0525  | 2.11        |
| VC0534  | 2.25        |
| VC0537  | 3.16        |
| VC0538  | 9.90        |
| VC0539  | 3.16        |
| VC0541  | 4.88        |
| VC0547  | 0.30        |
| VC0557  | 3.17        |
| VC0561  | 2.36        |

| Gene ID | Fold Change |
|---------|-------------|
| VC0562  | 2.31        |
| VC0563  | 2.73        |
| VC0564  | 3.29        |
| VC0574  | 0.44        |
| VC0578  | 2.04        |
| VC0583  | 0.11        |
| VC0592  | 2.08        |
| VC0594  | 3.74        |
| VC0602  | 2.54        |
| VC0605  | 2.28        |
| VC0608  | 0.15        |
| VC0622  | 0.31        |
| VC0626  | 2.86        |
| VC0640  | 2.19        |
| VC0646  | 3.75        |
| VC0649  | 0.44        |
| VC0656  | 2.47        |
| VC0658  | 2.95        |
| VC0660  | 2.18        |
| VC0662  | 2.00        |
| VC0663  | 2.76        |
| VC0664  | 2.45        |
| VC0667  | 5.60        |
| VC0679  | 3.63        |
| VC0681  | 2.22        |
| VC0682  | 2.29        |
| VC0695  | 3.21        |
| VC0696  | 2.04        |
| VC0697  | 0.36        |
| VC0707  | 0.44        |
| VC0712  | 2.24        |
| VC0717  | 2.93        |
| VC0722  | 0.43        |
| VC0723  | 0.44        |
| VC0737  | 0.40        |
| VC0739  | 2.80        |
| VC0746  | 2.19        |
| VC0752  | 2.21        |
| VC0763  | 2.93        |
| VC0764  | 3.13        |
| VC0765  | 3.85        |
| VC0773  | 0.49        |
| VC0774  | 0.34        |
| VC0784  | 0.41        |
| VC0808  | 3.48        |
| VC0811  | 0.48        |
| VC0823  | 2.98        |

| Gene ID | Fold Change |
|---------|-------------|
| VC0824  | 11.82       |
| VC0826  | 13.27       |
| VC0827  | 9.20        |
| VC0834  | 19.24       |
| VC0837  | 9.65        |
| VC0847  | 2.15        |
| VC0857  | 0.48        |
| VC0864  | 2.10        |
| VC0868  | 2.60        |
| VC0870  | 2.02        |
| VC0875  | 3.12        |
| VC0877  | 2.77        |
| VC0880  | 3.60        |
| VC0881  | 2.40        |
| VC0883  | 0.30        |
| VC0894  | 2.02        |
| VC0903  | 2.19        |
| VC0905  | 5.18        |
| VC0906  | 3.10        |
| VC0916  | 3.76        |
| VC0918  | 2.93        |
| VC0919  | 2.36        |
| VC0922  | 2.04        |
| VC0928  | 5.89        |
| VC0929  | 2.83        |
| VC0930  | 21.04       |
| VC0931  | 2.30        |
| VC0932  | 7.46        |
| VC0933  | 5.89        |
| VC0935  | 12.75       |
| VC0936  | 2.63        |
| VC0939  | 2.73        |
| VC0945  | 5.28        |
| VC0951  | 2.72        |
| VC0956  | 2.42        |
| VC0957  | 0.15        |
| VC0962  | 2.83        |
| VC0963  | 2.09        |
| VC0965  | 4.99        |
| VC0966  | 2.41        |
| VC0968  | 8.57        |
| VC0969  | 2.83        |
| VC0972  | 0.38        |
| VC0977  | 3.55        |
| VC0985  | 3.25        |
| VC0988  | 2.12        |
| VC0998  | 0.38        |

| Gene ID | Fold Change |
|---------|-------------|
| VC1008  | 0.46        |
| VC1010  | 3.81        |
| VC1018  | 2.05        |
| VC1024  | 2.55        |
| VC1031  | 0.46        |
| VC1032  | 0.48        |
| VC1034  | 0.12        |
| VC1036  | 2.65        |
| VC1043  | 0.17        |
| VC1046  | 0.19        |
| VC1047  | 0.16        |
| VC1051  | 3.36        |
| VC1052  | 2.45        |
| VC1054  | 2.09        |
| VC1059  | 0.28        |
| VC1075  | 9.74        |
| VC1078  | 2.11        |
| VC1080  | 0.32        |
| VC1081  | 0.49        |
| VC1082  | 0.47        |
| VC1083  | 0.47        |
| VC1084  | 0.39        |
| VC1085  | 0.47        |
| VC1086  | 0.38        |
| VC1087  | 0.43        |
| VC1091  | 0.43        |
| VC1094  | 0.44        |
| VC1097  | 2.91        |
| VC1099  | 2.24        |
| VC1106  | 3.18        |
| VC1109  | 2.18        |
| VC1121  | 0.48        |
| VC1122  | 0.42        |
| VC1125  | 0.47        |
| VC1126  | 3.17        |
| VC1127  | 2.45        |
| VC1128  | 3.50        |
| VC1139  | 2.30        |
| VC1140  | 2.51        |
| VC1147  | 0.24        |
| VC1148  | 0.40        |
| VC1150  | 0.28        |
| VC1153  | 0.47        |
| VC1155  | 0.02        |
| VC1156  | 0.18        |
| VC1157  | 0.21        |
| VC1164  | 2.93        |

| Gene ID | Fold Change |
|---------|-------------|
| VC1165  | 2.71        |
| VC1166  | 2.29        |
| VC1169  | 2.05        |
| VC1176  | 0.44        |
| VC1182  | 2.41        |
| VC1194  | 3.31        |
| VC1195  | 2.10        |
| VC1201  | 2.44        |
| VC1208  | 2.01        |
| VC1209  | 2.09        |
| VC1212  | 2.13        |
| VC1215  | 2.25        |
| VC1221  | 0.44        |
| VC1222  | 0.46        |
| VC1224  | 0.31        |
| VC1235  | 9.46        |
| VC1242  | 0.07        |
| VC1246  | 3.25        |
| VC1247  | 0.17        |
| VC1248  | 0.03        |
| VC1249  | 0.10        |
| VC1262  | 0.07        |
| VC1264  | 0.25        |
| VC1265  | 0.33        |
| VC1266  | 0.25        |
| VC1267  | 0.45        |
| VC1268  | 2.50        |
| VC1269  | 0.34        |
| VC1270  | 0.47        |
| VC1277  | 0.42        |
| VC1280  | 0.14        |
| VC1281  | 0.10        |
| VC1291  | 2.18        |
| VC1293  | 4.90        |
| VC1298  | 0.19        |
| VC1300  | 0.46        |
| VC1301  | 0.40        |
| VC1302  | 0.42        |
| VC1314  | 0.19        |
| VC1315  | 0.50        |
| VC1316  | 0.25        |
| VC1318  | 5.35        |
| VC1325  | 0.09        |
| VC1327  | 0.18        |
| VC1334  | 0.31        |
| VC1343  | 2.54        |
| VC1344  | 0.43        |

| Gene ID | Fold Change |
|---------|-------------|
| VC1345  | 0.40        |
| VC1346  | 0.47        |
| VC1352  | 0.23        |
| VC1362  | 0.45        |
| VC1364  | 2.30        |
| VC1365  | 4.20        |
| VC1366  | 2.77        |
| VC1368  | 2.41        |
| VC1369  | 0.40        |
| VC1370  | 0.37        |
| VC1373  | 2.06        |
| VC1378  | 2.06        |
| VC1379  | 2.42        |
| VC1395  | 0.41        |
| VC1396  | 0.33        |
| VC1397  | 0.32        |
| VC1398  | 0.44        |
| VC1399  | 0.43        |
| VC1400  | 0.43        |
| VC1401  | 0.30        |
| VC1402  | 0.27        |
| VC1406  | 0.46        |
| VC1413  | 2.92        |
| VC1420  | 0.34        |
| VC1421  | 3.66        |
| VC1422  | 11.24       |
| VC1438  | 0.32        |
| VC1439  | 0.43        |
| VC1440  | 0.39        |
| VC1441  | 0.34        |
| VC1442  | 0.34        |
| VC1449  | 4.10        |
| VC1450  | 3.37        |
| VC1453  | 2.34        |
| VC1456  | 3.07        |
| VC1457  | 2.83        |
| VC1461  | 2.59        |
| VC1462  | 4.26        |
| VC1480  | 0.30        |
| VC1481  | 0.19        |
| VC1482  | 0.46        |
| VC1491  | 2.28        |
| VC1492  | 0.43        |
| VC1495  | 4.89        |
| VC1506  | 0.43        |
| VC1508  | 2.06        |
| VC1509  | 0.45        |

| Gene ID | Fold Change |
|---------|-------------|
| VC1523  | 0.49        |
| VC1524  | 0.41        |
| VC1531  | 2.30        |
| VC1532  | 0.48        |
| VC1534  | 2.68        |
| VC1539  | 0.10        |
| VC1540  | 2.31        |
| VC1544  | 0.44        |
| VC1545  | 0.38        |
| VC1548  | 0.45        |
| VC1555  | 0.45        |
| VC1556  | 0.30        |
| VC1558  | 0.35        |
| VC1559  | 0.18        |
| VC1560  | 0.21        |
| VC1572  | 0.48        |
| VC1573  | 0.35        |
| VC1577  | 7.25        |
| VC1578  | 25.62       |
| VC1579  | 7.51        |
| VC1583  | 2.03        |
| VC1590  | 0.33        |
| VC1591  | 0.49        |
| VC1595  | 0.34        |
| VC1599  | 0.44        |
| VC1604  | 0.34        |
| VC1605  | 0.25        |
| VC1612  | 0.22        |
| VC1613  | 0.40        |
| VC1617  | 0.17        |
| VC1618  | 0.16        |
| VC1619  | 0.36        |
| VC1620  | 0.42        |
| VC1623  | 2.98        |
| VC1624  | 2.26        |
| VC1625  | 2.53        |
| VC1628  | 3.75        |
| VC1629  | 2.24        |
| VC1630  | 4.00        |
| VC1633  | 2.93        |
| VC1635  | 2.35        |
| VC1640  | 2.55        |
| VC1642  | 3.34        |
| VC1643  | 0.15        |
| VC1644  | 0.50        |
| VC1645  | 0.04        |
| VC1646  | 2.47        |

| Gene ID | Fold Change |
|---------|-------------|
| VC1659  | 0.44        |
| VC1661  | 5.46        |
| VC1664  | 0.42        |
| VC1671  | 2.50        |
| VC1673  | 0.42        |
| VC1674  | 0.31        |
| VC1675  | 0.37        |
| VC1678  | 0.47        |
| VC1686  | 2.25        |
| VC1696  | 0.08        |
| VC1700  | 3.50        |
| VC1701  | 2.81        |
| VC1703  | 0.41        |
| VC1704  | 0.27        |
| VC1707  | 0.29        |
| VC1710  | 0.21        |
| VC1718  | 0.30        |
| VC1719  | 3.38        |
| VC1721  | 2.02        |
| VC1727  | 0.44        |
| VC1731  | 2.89        |
| VC1732  | 2.31        |
| VC1739  | 2.08        |
| VC1754  | 0.47        |
| VC1761  | 0.40        |
| VC1763  | 0.35        |
| VC1766  | 0.34        |
| VC1770  | 0.34        |
| VC1771  | 0.27        |
| VC1772  | 0.39        |
| VC1787  | 0.18        |
| VC1788  | 0.48        |
| VC1831  | 0.17        |
| VC1832  | 2.02        |
| VC1834  | 2.03        |
| VC1842  | 0.44        |
| VC1843  | 0.40        |
| VC1844  | 0.29        |
| VC1849  | 3.81        |
| VC1852  | 2.36        |
| VC1854  | 0.08        |
| VC1855  | 2.35        |
| VC1869  | 2.16        |
| VC1871  | 2.60        |
| VC1885  | 2.64        |
| VC1888  | 7.84        |
| VC1892  | 6.50        |

| Gene ID | Fold Change |
|---------|-------------|
| VC1898  | 0.11        |
| VC1905  | 2.19        |
| VC1919  | 0.43        |
| VC1927  | 0.11        |
| VC1928  | 0.06        |
| VC1929  | 0.05        |
| VC1934  | 0.42        |
| VC1938  | 0.26        |
| VC1947  | 4.54        |
| VC1959  | 2.15        |
| VC1963  | 2.55        |
| VC1968  | 2.08        |
| VC1971  | 6.06        |
| VC1981  | 2.68        |
| VC1982  | 6.25        |
| VC1983  | 2.20        |
| VC1984  | 0.42        |
| VC1985  | 0.26        |
| VC1990  | 2.11        |
| VC1992  | 4.46        |
| VC1993  | 0.12        |
| VC2001  | 2.08        |
| VC2002  | 2.11        |
| VC2003  | 2.13        |
| VC2007  | 0.25        |
| VC2010  | 0.23        |
| VC2013  | 0.34        |
| VC2019  | 2.92        |
| VC2021  | 2.14        |
| VC2022  | 3.17        |
| VC2023  | 4.54        |
| VC2024  | 6.48        |
| VC2025  | 2.49        |
| VC2026  | 2.25        |
| VC2027  | 2.34        |
| VC2031  | 3.13        |
| VC2044  | 3.95        |
| VC2047  | 0.10        |
| VC2062  | 0.43        |
| VC2063  | 0.47        |
| VC2068  | 0.42        |
| VC2069  | 0.40        |
| VC2070  | 0.25        |
| VC2074  | 2.27        |
| VC2076  | 0.38        |
| VC2077  | 0.36        |
| VC2084  | 0.46        |

| Gene ID | Fold Change |
|---------|-------------|
| VC2085  | 0.30        |
| VC2086  | 0.25        |
| VC2087  | 0.25        |
| VC2088  | 0.19        |
| VC2089  | 0.20        |
| VC2090  | 0.39        |
| VC2091  | 0.27        |
| VC2092  | 0.28        |
| VC2095  | 0.46        |
| VC2096  | 0.50        |
| VC2104  | 0.39        |
| VC2105  | 0.18        |
| VC2113  | 2.63        |
| VC2117  | 5.07        |
| VC2122  | 0.49        |
| VC2124  | 0.30        |
| VC2125  | 0.32        |
| VC2126  | 0.31        |
| VC2127  | 0.35        |
| VC2134  | 0.34        |
| VC2135  | 0.45        |
| VC2136  | 0.38        |
| VC2141  | 0.49        |
| VC2145  | 3.87        |
| VC2146  | 5.13        |
| VC2148  | 2.02        |
| VC2149  | 2.48        |
| VC2150  | 3.40        |
| VC2152  | 2.57        |
| VC2154  | 2.09        |
| VC2157  | 2.23        |
| VC2158  | 2.37        |
| VC2163  | 2.63        |
| VC2168  | 2.35        |
| VC2173  | 2.10        |
| VC2174  | 0.25        |
| VC2183  | 3.58        |
| VC2187  | 0.25        |
| VC2188  | 0.24        |
| VC2189  | 0.24        |
| VC2190  | 0.25        |
| VC2191  | 0.26        |
| VC2192  | 0.33        |
| VC2193  | 0.42        |
| VC2194  | 0.19        |
| VC2195  | 0.35        |
| VC2196  | 0.26        |

| Gene ID | Fold Change |
|---------|-------------|
| VC2197  | 0.32        |
| VC2198  | 0.30        |
| VC2199  | 0.35        |
| VC2200  | 0.22        |
| VC2206  | 0.39        |
| VC2207  | 0.20        |
| VC2208  | 0.43        |
| VC2210  | 0.31        |
| VC2212  | 2.84        |
| VC2213  | 2.33        |
| VC2214  | 2.52        |
| VC2236  | 2.09        |
| VC2239  | 2.13        |
| VC2241  | 0.47        |
| VC2261  | 2.65        |
| VC2264  | 0.24        |
| VC2267  | 2.06        |
| VC2275  | 0.45        |
| VC2279  | 2.83        |
| VC2306  | 0.40        |
| VC2317  | 2.35        |
| VC2318  | 2.09        |
| VC2334  | 2.01        |
| VC2338  | 0.46        |
| VC2341  | 0.45        |
| VC2342  | 2.59        |
| VC2345  | 2.38        |
| VC2347  | 2.18        |
| VC2356  | 2.15        |
| VC2357  | 0.11        |
| VC2358  | 0.38        |
| VC2378  | 0.30        |
| VC2391  | 2.65        |
| VC2420  | 2.13        |
| VC2432  | 0.48        |
| VC2433  | 0.36        |
| VC2434  | 0.31        |
| VC2441  | 2.04        |
| VC2442  | 2.12        |
| VC2447  | 5.46        |
| VC2448  | 3.64        |
| VC2449  | 2.98        |
| VC2467  | 0.47        |
| VC2471  | 0.46        |
| VC2472  | 2.67        |
| VC2473  | 0.16        |
| VC2476  | 2.29        |

| Gene ID | Fold Change |
|---------|-------------|
| VC2478  | 2.25        |
| VC2480  | 2.41        |
| VC2481  | 2.05        |
| VC2484  | 3.48        |
| VC2485  | 2.56        |
| VC2503  | 2.71        |
| VC2516  | 2.04        |
| VC2517  | 2.04        |
| VC2519  | 2.10        |
| VC2523  | 2.29        |
| VC2543  | 0.15        |
| VC2544  | 0.20        |
| VC2546  | 3.27        |
| VC2548  | 2.05        |
| VC2550  | 0.43        |
| VC2558  | 4.08        |
| VC2559  | 5.27        |
| VC2562  | 0.32        |
| VC2568  | 3.43        |
| VC2569  | 2.52        |
| VC2600  | 2.10        |
| VC2602  | 2.31        |
| VC2603  | 0.36        |
| VC2604  | 2.37        |
| VC2605  | 3.27        |
| VC2610  | 2.31        |
| VC2619  | 3.25        |
| VC2626  | 2.38        |
| VC2628  | 2.60        |
| VC2632  | 0.38        |
| VC2640  | 2.05        |
| VC2644  | 0.36        |
| VC2647  | 4.62        |
| VC2648  | 3.01        |
| VC2654  | 2.53        |
| VC2656  | 0.45        |
| VC2657  | 0.23        |
| VC2658  | 0.13        |
| VC2659  | 0.07        |
| VC2660  | 3.10        |
| VC2662  | 2.96        |
| VC2663  | 2.55        |
| VC2667  | 10.15       |
| VC2670  | 2.56        |
| VC2672  | 2.10        |
| VC2679  | 7.23        |
| VC2681  | 3.13        |

| Gene ID | Fold Change |
|---------|-------------|
| VC2698  | 0.07        |
| VC2699  | 0.47        |
| VC2700  | 0.48        |
| VC2702  | 0.18        |
| VC2704  | 0.07        |
| VC2705  | 0.15        |
| VC2708  | 2.01        |
| VC2709  | 2.37        |
| VC2738  | 0.27        |
| VC2743  | 2.05        |
| VC2744  | 6.99        |
| VC2746  | 5.72        |
| VC2749  | 0.41        |
| VC2753  | 4.24        |
| VC2758  | 0.34        |
| VC2761  | 0.37        |
| VC2772  | 0.44        |
| VCA0005 | 2.58        |
| VCA0010 | 2.38        |
| VCA0014 | 0.45        |
| VCA0016 | 0.10        |
| VCA0017 | 0.50        |
| VCA0025 | 0.28        |
| VCA0031 | 0.19        |
| VCA0032 | 0.34        |
| VCA0037 | 0.38        |
| VCA0052 | 0.36        |
| VCA0055 | 2.98        |
| VCA0075 | 8.74        |
| VCA0083 | 2.47        |
| VCA0087 | 25.06       |
| VCA0091 | 2.31        |
| VCA0124 | 2.94        |
| VCA0125 | 3.94        |
| VCA0128 | 0.50        |
| VCA0130 | 0.31        |
| VCA0136 | 4.26        |
| VCA0141 | 0.33        |
| VCA0152 | 0.29        |
| VCA0154 | 0.49        |
| VCA0161 | 0.02        |
| VCA0166 | 3.06        |
| VCA0167 | 3.87        |
| VCA0176 | 0.48        |
| VCA0180 | 2.34        |
| VCA0190 | 2.32        |
| VCA0198 | 2.51        |

| Gene ID | Fold Change |
|---------|-------------|
| VCA0205 | 0.31        |
| VCA0223 | 0.12        |
| VCA0224 | 0.45        |
| VCA0225 | 2.46        |
| VCA0227 | 0.18        |
| VCA0274 | 0.46        |
| VCA0278 | 0.42        |
| VCA0280 | 0.33        |
| VCA0281 | 0.14        |
| VCA0292 | 0.18        |
| VCA0297 | 0.43        |
| VCA0298 | 0.25        |
| VCA0299 | 0.35        |
| VCA0300 | 0.47        |
| VCA0304 | 0.35        |
| VCA0306 | 0.50        |
| VCA0307 | 0.44        |
| VCA0308 | 0.45        |
| VCA0312 | 2.49        |
| VCA0316 | 0.37        |
| VCA0317 | 0.26        |
| VCA0321 | 0.41        |
| VCA0322 | 0.32        |
| VCA0328 | 0.38        |
| VCA0330 | 0.28        |
| VCA0333 | 2.14        |
| VCA0337 | 0.26        |
| VCA0345 | 0.21        |
| VCA0350 | 0.26        |
| VCA0357 | 0.48        |
| VCA0358 | 0.48        |
| VCA0376 | 0.49        |
| VCA0378 | 0.33        |
| VCA0383 | 0.23        |
| VCA0384 | 0.50        |
| VCA0395 | 0.19        |
| VCA0406 | 0.22        |
| VCA0407 | 0.48        |
| VCA0409 | 0.47        |
| VCA0410 | 0.43        |
| VCA0412 | 0.45        |
| VCA0429 | 0.47        |
| VCA0431 | 0.49        |
| VCA0435 | 0.40        |
| VCA0436 | 0.39        |
| VCA0439 | 0.31        |
| VCA0443 | 0.34        |

| Gene ID | Fold Change |
|---------|-------------|
| VCA0445 | 2.32        |
| VCA0448 | 0.15        |
| VCA0467 | 0.49        |
| VCA0491 | 0.47        |
| VCA0492 | 0.30        |
| VCA0494 | 0.27        |
| VCA0502 | 0.45        |
| VCA0505 | 0.49        |
| VCA0511 | 0.23        |
| VCA0512 | 0.45        |
| VCA0516 | 0.37        |
| VCA0518 | 0.38        |
| VCA0522 | 0.49        |
| VCA0523 | 0.30        |
| VCA0525 | 3.61        |
| VCA0537 | 0.47        |
| VCA0545 | 2.08        |
| VCA0546 | 3.03        |
| VCA0549 | 2.40        |
| VCA0558 | 0.25        |
| VCA0574 | 0.17        |
| VCA0576 | 0.15        |
| VCA0582 | 3.31        |
| VCA0594 | 0.16        |
| VCA0609 | 0.18        |
| VCA0610 | 0.34        |
| VCA0616 | 3.10        |
| VCA0623 | 0.33        |
| VCA0625 | 0.37        |
| VCA0628 | 0.08        |
| VCA0638 | 0.44        |
| VCA0639 | 0.29        |
| VCA0644 | 0.45        |
| VCA0646 | 0.48        |
| VCA0647 | 0.39        |
| VCA0648 | 0.44        |
| VCA0658 | 0.45        |
| VCA0663 | 2.25        |
| VCA0678 | 0.41        |
| VCA0685 | 0.05        |
| VCA0686 | 0.44        |
| VCA0687 | 0.25        |
| VCA0688 | 0.02        |
| VCA0689 | 0.01        |
| VCA0690 | 0.01        |
| VCA0691 | 0.01        |
| VCA0694 | 3.07        |

| Gene ID | Fold Change |
|---------|-------------|
| VCA0696 | 0.48        |
| VCA0697 | 0.09        |
| VCA0698 | 0.23        |
| VCA0699 | 0.44        |
| VCA0702 | 0.36        |
| VCA0710 | 2.73        |
| VCA0721 | 4.78        |
| VCA0728 | 0.42        |
| VCA0730 | 0.46        |
| VCA0736 | 0.47        |
| VCA0738 | 0.26        |
| VCA0741 | 2.27        |
| VCA0742 | 2.38        |
| VCA0745 | 0.36        |
| VCA0752 | 2.07        |
| VCA0757 | 0.47        |
| VCA0758 | 0.36        |
| VCA0759 | 0.38        |
| VCA0760 | 0.23        |
| VCA0764 | 3.53        |
| VCA0765 | 3.16        |
| VCA0769 | 3.83        |
| VCA0770 | 7.75        |
| VCA0771 | 9.72        |
| VCA0772 | 2.02        |
| VCA0774 | 0.37        |
| VCA0798 | 0.09        |
| VCA0799 | 3.33        |
| VCA0801 | 8.22        |
| VCA0804 | 2.84        |
| VCA0812 | 0.24        |
| VCA0839 | 0.32        |
| VCA0840 | 3.39        |
| VCA0842 | 2.19        |
| VCA0843 | 0.35        |
| VCA0849 | 3.10        |
| VCA0860 | 0.40        |
| VCA0864 | 2.53        |
| VCA0865 | 0.13        |
| VCA0866 | 0.21        |
| VCA0871 | 2.54        |
| VCA0877 | 0.16        |
| VCA0878 | 0.12        |
| VCA0879 | 0.31        |
| VCA0880 | 0.24        |
| VCA0881 | 0.06        |
| VCA0882 | 0.08        |



| Gene ID | Fold Change |
|---------|-------------|
| VCA0883 | 0.03        |
| VCA0884 | 0.25        |
| VCA0892 | 0.06        |
| VCA0895 | 0.46        |
| VCA0896 | 4.49        |
| VCA0897 | 4.08        |
| VCA0898 | 2.25        |
| VCA0908 | 0.16        |
| VCA0910 | 0.23        |
| VCA0911 | 0.49        |
| VCA0916 | 0.27        |
| VCA0917 | 0.28        |
| VCA0918 | 0.16        |
| VCA0923 | 4.62        |
| VCA0925 | 2.38        |
| VCA0931 | 0.48        |
| VCA0936 | 2.02        |
| VCA0943 | 0.42        |
| VCA0945 | 0.14        |

| Gene ID | Fold Change |
|---------|-------------|
| VCA0952 | 74.62       |
| VCA0953 | 2.96        |
| VCA0965 | 0.31        |
| VCA0970 | 4.45        |
| VCA0980 | 0.39        |
| VCA0981 | 0.48        |
| VCA0986 | 0.43        |
| VCA0994 | 0.26        |
| VCA1004 | 0.22        |
| VCA1024 | 0.47        |
| VCA1025 | 2.55        |
| VCA1027 | 0.33        |
| VCA1028 | 0.40        |
| VCA1033 | 0.23        |
| VCA1034 | 0.17        |
| VCA1041 | 0.34        |
| VCA1042 | 0.41        |
| VCA1043 | 0.49        |
| VCA1044 | 0.26        |

| Gene ID | Fold Change |
|---------|-------------|
| VCA1045 | 0.37        |
| VCA1046 | 0.27        |
| VCA1050 | 0.49        |
| VCA1060 | 9.45        |
| VCA1065 | 0.18        |
| VCA1068 | 0.35        |
| VCA1069 | 0.18        |
| VCA1071 | 0.14        |
| VCA1072 | 0.44        |
| VCA1073 | 0.09        |
| VCA1076 | 0.33        |
| VCA1079 | 2.05        |
| VCA1085 | 0.23        |
| VCA1091 | 0.43        |
| VCA1103 | 0.47        |
| VCA1107 | 0.43        |
| VCA1113 | 0.25        |

**Table S2.** Genes that are differentially expressed in  $\Delta crp$  relative to wild type. Differentially expressed genes were determined using SAM software with  $\geq 2.0$  fold change in gene expression and False Discovery Rate (FDR)  $\leq 1\%$  as a criteria.

| Gene ID | Fold Change |
|---------|-------------|
| VC0008  | 4.83        |
| VC0010  | 8.32        |
| VC0011  | 3.38        |
| VC0015  | 0.48        |
| VC0017  | 0.22        |
| VC0018  | 3.09        |
| VC0023  | 0.22        |
| VC0024  | 2.17        |
| VC0027  | 0.39        |
| VC0029  | 0.13        |
| VC0030  | 0.11        |
| VC0031  | 0.09        |
| VC0036  | 0.11        |
| VC0045  | 2.57        |
| VC0050  | 2.43        |
| VC0054  | 2.34        |
| VC0056  | 2.26        |
| VC0057  | 2.35        |
| VC0059  | 6.59        |
| VC0061  | 2.93        |
| VC0064  | 2.47        |
| VC0065  | 2.52        |
| VC0067  | 2.22        |
| VC0069  | 0.08        |
| VC0070  | 2.94        |
| VC0072  | 2.53        |
| VC0073  | 3.31        |
| VC0074  | 0.49        |
| VC0076  | 0.11        |
| VC0078  | 2.27        |
| VC0079  | 2.43        |
| VC0080  | 2.24        |
| VC0083  | 2.39        |
| VC0086  | 2.33        |
| VC0087  | 2.38        |
| VC0089  | 0.05        |
| VC0102  | 0.42        |
| VC0107  | 3.22        |
| VC0113  | 4.73        |
| VC0117  | 0.23        |
| VC0118  | 0.35        |
| VC0119  | 0.45        |
| VC0122  | 6.05        |

| Gene ID | Fold Change |
|---------|-------------|
| VC0128  | 2.65        |
| VC0131  | 2.75        |
| VC0133  | 0.38        |
| VC0134  | 4.14        |
| VC0135  | 2.58        |
| VC0141  | 2.03        |
| VC0142  | 0.37        |
| VC0146  | 0.32        |
| VC0154  | 2.20        |
| VC0159  | 0.30        |
| VC0162  | 0.25        |
| VC0168  | 0.17        |
| VC0170  | 0.35        |
| VC0172  | 0.43        |
| VC0175  | 0.19        |
| VC0178  | 2.41        |
| VC0186  | 2.22        |
| VC0187  | 3.02        |
| VC0191  | 2.36        |
| VC0195  | 3.07        |
| VC0196  | 2.28        |
| VC0197  | 2.30        |
| VC0210  | 3.88        |
| VC0216  | 0.19        |
| VC0218  | 2.76        |
| VC0219  | 2.79        |
| VC0222  | 2.35        |
| VC0227  | 2.48        |
| VC0228  | 2.40        |
| VC0236  | 0.34        |
| VC0268  | 2.47        |
| VC0277  | 2.01        |
| VC0290  | 4.92        |
| VC0291  | 5.72        |
| VC0292  | 3.61        |
| VC0298  | 0.29        |
| VC0299  | 0.25        |
| VC0300  | 0.32        |
| VC0307  | 2.35        |
| VC0314  | 2.53        |
| VC0323  | 2.02        |
| VC0325  | 2.08        |
| VC0330  | 0.41        |

| Gene ID | Fold Change |
|---------|-------------|
| VC0342  | 2.22        |
| VC0359  | 2.77        |
| VC0364  | 0.20        |
| VC0365  | 2.12        |
| VC0366  | 2.43        |
| VC0369  | 2.19        |
| VC0383  | 6.35        |
| VC0384  | 9.58        |
| VC0385  | 10.19       |
| VC0386  | 6.46        |
| VC0387  | 4.68        |
| VC0391  | 8.25        |
| VC0400  | 0.49        |
| VC0421  | 2.12        |
| VC0423  | 2.14        |
| VC0424  | 3.14        |
| VC0430  | 2.65        |
| VC0432  | 0.12        |
| VC0438  | 2.11        |
| VC0440  | 2.05        |
| VC0447  | 2.20        |
| VC0451  | 2.99        |
| VC0453  | 3.38        |
| VC0454  | 7.42        |
| VC0456  | 2.32        |
| VC0457  | 2.08        |
| VC0458  | 2.80        |
| VC0461  | 3.06        |
| VC0468  | 2.52        |
| VC0469  | 2.14        |
| VC0475  | 2.14        |
| VC0476  | 2.70        |
| VC0478  | 2.01        |
| VC0479  | 3.40        |
| VC0480  | 2.31        |
| VC0484  | 2.90        |
| VC0488  | 0.36        |
| VC0490  | 0.23        |
| VC0491  | 0.04        |
| VC0492  | 0.07        |
| VC0537  | 2.84        |
| VC0538  | 10.26       |
| VC0539  | 3.04        |

| Gene ID | Fold Change |
|---------|-------------|
| VC0541  | 3.93        |
| VC0547  | 0.22        |
| VC0548  | 0.48        |
| VC0556  | 2.77        |
| VC0557  | 3.05        |
| VC0561  | 2.52        |
| VC0562  | 2.55        |
| VC0563  | 2.93        |
| VC0564  | 3.06        |
| VC0574  | 0.23        |
| VC0575  | 0.35        |
| VC0583  | 0.48        |
| VC0592  | 2.13        |
| VC0594  | 3.57        |
| VC0608  | 0.20        |
| VC0622  | 0.23        |
| VC0633  | 0.12        |
| VC0640  | 3.15        |
| VC0646  | 3.68        |
| VC0647  | 0.48        |
| VC0649  | 0.40        |
| VC0656  | 2.90        |
| VC0658  | 3.34        |
| VC0660  | 3.05        |
| VC0667  | 6.40        |
| VC0679  | 2.12        |
| VC0693  | 0.39        |
| VC0695  | 2.20        |
| VC0707  | 0.44        |
| VC0712  | 3.75        |
| VC0713  | 2.47        |
| VC0716  | 2.16        |
| VC0717  | 4.14        |
| VC0723  | 0.34        |
| VC0731  | 2.21        |
| VC0739  | 2.75        |
| VC0746  | 2.21        |
| VC0748  | 3.31        |
| VC0749  | 2.86        |
| VC0752  | 2.51        |
| VC0757  | 2.20        |
| VC0763  | 2.72        |
| VC0764  | 2.76        |
| VC0765  | 2.77        |
| VC0786  | 4.07        |
| VC0789  | 2.42        |
| VC0808  | 2.54        |

| Gene ID | Fold Change |
|---------|-------------|
| VC0815  | 0.48        |
| VC0823  | 5.83        |
| VC0824  | 5.80        |
| VC0826  | 9.85        |
| VC0827  | 5.41        |
| VC0834  | 3.40        |
| VC0837  | 4.56        |
| VC0842  | 2.43        |
| VC0851  | 2.40        |
| VC0855  | 2.78        |
| VC0856  | 2.50        |
| VC0873  | 2.05        |
| VC0875  | 3.04        |
| VC0879  | 0.24        |
| VC0881  | 2.10        |
| VC0883  | 0.36        |
| VC0894  | 2.75        |
| VC0895  | 2.08        |
| VC0905  | 2.65        |
| VC0906  | 2.62        |
| VC0916  | 3.35        |
| VC0918  | 2.16        |
| VC0919  | 2.37        |
| VC0928  | 5.45        |
| VC0929  | 3.57        |
| VC0930  | 8.01        |
| VC0932  | 4.27        |
| VC0933  | 5.99        |
| VC0935  | 8.06        |
| VC0936  | 2.32        |
| VC0939  | 2.84        |
| VC0945  | 16.02       |
| VC0946  | 2.55        |
| VC0951  | 2.13        |
| VC0953  | 2.11        |
| VC0956  | 4.29        |
| VC0957  | 0.38        |
| VC0961  | 2.07        |
| VC0962  | 2.03        |
| VC0965  | 2.62        |
| VC0968  | 5.87        |
| VC0969  | 2.42        |
| VC0972  | 0.47        |
| VC0977  | 3.23        |
| VC0981  | 2.15        |
| VC0985  | 3.46        |
| VC0998  | 0.33        |

| Gene ID | Fold Change |
|---------|-------------|
| VC1010  | 2.00        |
| VC1029  | 2.17        |
| VC1034  | 0.08        |
| VC1037  | 2.26        |
| VC1043  | 0.25        |
| VC1046  | 0.18        |
| VC1047  | 0.19        |
| VC1051  | 3.27        |
| VC1052  | 2.75        |
| VC1059  | 0.22        |
| VC1075  | 16.28       |
| VC1077  | 2.12        |
| VC1080  | 0.31        |
| VC1086  | 0.40        |
| VC1091  | 0.32        |
| VC1094  | 0.23        |
| VC1095  | 0.30        |
| VC1099  | 2.48        |
| VC1105  | 2.71        |
| VC1106  | 2.98        |
| VC1112  | 3.87        |
| VC1113  | 3.79        |
| VC1114  | 2.41        |
| VC1127  | 3.09        |
| VC1128  | 4.02        |
| VC1140  | 3.02        |
| VC1142  | 2.31        |
| VC1146  | 2.32        |
| VC1147  | 0.32        |
| VC1148  | 0.36        |
| VC1150  | 0.37        |
| VC1156  | 0.24        |
| VC1157  | 0.23        |
| VC1158  | 0.37        |
| VC1164  | 2.49        |
| VC1165  | 2.84        |
| VC1166  | 2.36        |
| VC1177  | 3.00        |
| VC1189  | 0.32        |
| VC1191  | 2.38        |
| VC1193  | 2.15        |
| VC1194  | 4.27        |
| VC1197  | 0.22        |
| VC1201  | 2.18        |
| VC1206  | 2.32        |
| VC1215  | 2.65        |
| VC1216  | 0.45        |

| Gene ID | Fold Change |
|---------|-------------|
| VC1235  | 4.46        |
| VC1242  | 0.07        |
| VC1246  | 3.79        |
| VC1247  | 0.38        |
| VC1248  | 0.03        |
| VC1249  | 0.23        |
| VC1258  | 0.43        |
| VC1259  | 8.75        |
| VC1262  | 0.10        |
| VC1263  | 2.23        |
| VC1264  | 0.39        |
| VC1266  | 0.28        |
| VC1268  | 2.17        |
| VC1277  | 0.46        |
| VC1281  | 0.17        |
| VC1293  | 3.78        |
| VC1298  | 0.13        |
| VC1300  | 0.33        |
| VC1301  | 0.13        |
| VC1302  | 0.45        |
| VC1304  | 0.43        |
| VC1307  | 0.49        |
| VC1314  | 0.22        |
| VC1316  | 0.31        |
| VC1318  | 6.52        |
| VC1323  | 2.15        |
| VC1324  | 0.36        |
| VC1325  | 0.07        |
| VC1327  | 0.20        |
| VC1334  | 0.38        |
| VC1340  | 2.18        |
| VC1344  | 0.42        |
| VC1345  | 0.43        |
| VC1346  | 0.47        |
| VC1350  | 2.16        |
| VC1352  | 0.33        |
| VC1362  | 0.32        |
| VC1364  | 2.59        |
| VC1365  | 4.88        |
| VC1366  | 2.78        |
| VC1368  | 4.22        |
| VC1378  | 2.47        |
| VC1379  | 6.17        |
| VC1383  | 0.49        |
| VC1384  | 0.45        |
| VC1385  | 0.36        |
| VC1393  | 2.57        |

| Gene ID | Fold Change |
|---------|-------------|
| VC1413  | 3.36        |
| VC1416  | 0.35        |
| VC1420  | 0.45        |
| VC1421  | 2.84        |
| VC1422  | 4.32        |
| VC1437  | 0.41        |
| VC1438  | 0.30        |
| VC1439  | 0.26        |
| VC1440  | 0.24        |
| VC1441  | 0.19        |
| VC1442  | 0.18        |
| VC1445  | 0.45        |
| VC1448  | 2.40        |
| VC1462  | 3.68        |
| VC1479  | 0.30        |
| VC1480  | 0.15        |
| VC1481  | 0.10        |
| VC1482  | 0.45        |
| VC1488  | 2.15        |
| VC1491  | 3.93        |
| VC1492  | 0.42        |
| VC1495  | 5.32        |
| VC1496  | 0.46        |
| VC1506  | 0.37        |
| VC1512  | 0.45        |
| VC1524  | 0.47        |
| VC1531  | 2.60        |
| VC1532  | 0.42        |
| VC1539  | 0.08        |
| VC1545  | 0.38        |
| VC1556  | 0.29        |
| VC1558  | 0.26        |
| VC1559  | 0.15        |
| VC1560  | 0.19        |
| VC1568  | 0.28        |
| VC1573  | 0.23        |
| VC1576  | 2.20        |
| VC1577  | 7.91        |
| VC1578  | 16.80       |
| VC1579  | 12.64       |
| VC1583  | 4.27        |
| VC1584  | 3.05        |
| VC1599  | 0.40        |
| VC1604  | 0.33        |
| VC1605  | 0.17        |
| VC1607  | 0.38        |
| VC1616  | 3.33        |

| Gene ID | Fold Change |
|---------|-------------|
| VC1617  | 0.28        |
| VC1618  | 0.21        |
| VC1619  | 0.46        |
| VC1620  | 0.41        |
| VC1623  | 2.91        |
| VC1628  | 3.75        |
| VC1629  | 2.14        |
| VC1630  | 6.12        |
| VC1633  | 2.10        |
| VC1635  | 2.58        |
| VC1640  | 2.35        |
| VC1641  | 2.56        |
| VC1642  | 2.47        |
| VC1643  | 0.21        |
| VC1644  | 0.49        |
| VC1645  | 0.04        |
| VC1646  | 2.07        |
| VC1661  | 8.58        |
| VC1663  | 0.39        |
| VC1664  | 0.43        |
| VC1673  | 0.35        |
| VC1674  | 0.27        |
| VC1682  | 0.40        |
| VC1684  | 0.42        |
| VC1685  | 0.46        |
| VC1696  | 0.08        |
| VC1700  | 5.04        |
| VC1704  | 0.20        |
| VC1707  | 0.40        |
| VC1708  | 2.11        |
| VC1710  | 0.29        |
| VC1716  | 0.18        |
| VC1718  | 0.25        |
| VC1721  | 2.91        |
| VC1725  | 2.75        |
| VC1727  | 0.26        |
| VC1731  | 2.65        |
| VC1736  | 3.39        |
| VC1741  | 0.42        |
| VC1754  | 0.22        |
| VC1760  | 0.25        |
| VC1761  | 0.26        |
| VC1763  | 0.44        |
| VC1765  | 0.33        |
| VC1766  | 0.32        |
| VC1768  | 0.33        |
| VC1769  | 0.35        |

| Gene ID | Fold Change |
|---------|-------------|
| VC1770  | 0.30        |
| VC1771  | 0.14        |
| VC1787  | 0.21        |
| VC1819  | 0.32        |
| VC1831  | 0.10        |
| VC1833  | 2.80        |
| VC1834  | 2.17        |
| VC1841  | 0.44        |
| VC1842  | 0.40        |
| VC1843  | 0.40        |
| VC1844  | 0.24        |
| VC1849  | 3.49        |
| VC1852  | 2.80        |
| VC1854  | 0.09        |
| VC1855  | 3.02        |
| VC1865  | 0.31        |
| VC1866  | 0.47        |
| VC1867  | 0.45        |
| VC1871  | 2.19        |
| VC1873  | 0.49        |
| VC1885  | 3.25        |
| VC1888  | 6.28        |
| VC1892  | 4.08        |
| VC1898  | 0.09        |
| VC1905  | 2.21        |
| VC1907  | 0.44        |
| VC1909  | 0.26        |
| VC1913  | 2.51        |
| VC1918  | 0.50        |
| VC1919  | 0.17        |
| VC1922  | 0.43        |
| VC1925  | 0.30        |
| VC1927  | 0.13        |
| VC1928  | 0.09        |
| VC1929  | 0.19        |
| VC1934  | 0.44        |
| VC1938  | 0.29        |
| VC1947  | 7.35        |
| VC1950  | 0.21        |
| VC1951  | 0.26        |
| VC1963  | 3.06        |
| VC1968  | 2.29        |
| VC1975  | 0.49        |
| VC1981  | 4.01        |
| VC1982  | 7.90        |
| VC1983  | 3.03        |
| VC1984  | 0.39        |

| Gene ID | Fold Change |
|---------|-------------|
| VC1985  | 0.14        |
| VC1992  | 2.95        |
| VC1993  | 0.10        |
| VC2002  | 3.68        |
| VC2007  | 0.26        |
| VC2010  | 0.23        |
| VC2011  | 0.45        |
| VC2013  | 0.17        |
| VC2019  | 3.76        |
| VC2021  | 2.27        |
| VC2022  | 2.59        |
| VC2023  | 4.34        |
| VC2024  | 6.28        |
| VC2031  | 4.08        |
| VC2037  | 0.37        |
| VC2042  | 2.09        |
| VC2044  | 4.87        |
| VC2047  | 0.15        |
| VC2068  | 0.38        |
| VC2069  | 0.35        |
| VC2070  | 0.35        |
| VC2074  | 2.53        |
| VC2076  | 0.37        |
| VC2077  | 0.30        |
| VC2084  | 0.25        |
| VC2085  | 0.27        |
| VC2086  | 0.12        |
| VC2087  | 0.17        |
| VC2088  | 0.18        |
| VC2089  | 0.16        |
| VC2090  | 0.39        |
| VC2091  | 0.22        |
| VC2092  | 0.26        |
| VC2102  | 0.22        |
| VC2105  | 0.25        |
| VC2108  | 2.55        |
| VC2113  | 2.95        |
| VC2120  | 0.42        |
| VC2122  | 0.48        |
| VC2124  | 0.22        |
| VC2125  | 0.28        |
| VC2126  | 0.30        |
| VC2127  | 0.28        |
| VC2134  | 0.37        |
| VC2145  | 2.79        |
| VC2146  | 4.67        |
| VC2150  | 2.88        |

| Gene ID | Fold Change |
|---------|-------------|
| VC2152  | 2.51        |
| VC2154  | 2.74        |
| VC2163  | 2.92        |
| VC2168  | 2.50        |
| VC2169  | 2.16        |
| VC2174  | 0.31        |
| VC2183  | 4.81        |
| VC2187  | 0.37        |
| VC2188  | 0.21        |
| VC2189  | 0.17        |
| VC2190  | 0.36        |
| VC2191  | 0.35        |
| VC2192  | 0.35        |
| VC2193  | 0.45        |
| VC2194  | 0.20        |
| VC2195  | 0.29        |
| VC2196  | 0.36        |
| VC2197  | 0.21        |
| VC2198  | 0.30        |
| VC2199  | 0.31        |
| VC2200  | 0.16        |
| VC2206  | 0.44        |
| VC2207  | 0.21        |
| VC2208  | 0.43        |
| VC2210  | 0.33        |
| VC2223  | 0.31        |
| VC2227  | 0.45        |
| VC2261  | 2.27        |
| VC2264  | 0.26        |
| VC2290  | 0.41        |
| VC2291  | 0.43        |
| VC2293  | 0.38        |
| VC2294  | 0.46        |
| VC2295  | 0.44        |
| VC2331  | 3.62        |
| VC2337  | 0.33        |
| VC2340  | 2.57        |
| VC2341  | 0.49        |
| VC2345  | 2.16        |
| VC2357  | 0.09        |
| VC2358  | 0.47        |
| VC2361  | 0.27        |
| VC2362  | 0.39        |
| VC2364  | 0.49        |
| VC2365  | 2.54        |
| VC2367  | 0.34        |
| VC2368  | 0.47        |

| Gene ID | Fold Change |
|---------|-------------|
| VC2378  | 0.35        |
| VC2389  | 0.46        |
| VC2390  | 0.38        |
| VC2391  | 2.09        |
| VC2395  | 2.29        |
| VC2398  | 0.47        |
| VC2415  | 2.03        |
| VC2420  | 2.02        |
| VC2431  | 0.49        |
| VC2433  | 0.41        |
| VC2434  | 0.32        |
| VC2447  | 2.34        |
| VC2448  | 2.12        |
| VC2450  | 2.20        |
| VC2459  | 2.03        |
| VC2471  | 0.27        |
| VC2473  | 0.36        |
| VC2476  | 2.10        |
| VC2477  | 2.02        |
| VC2478  | 3.90        |
| VC2479  | 2.10        |
| VC2480  | 3.01        |
| VC2497  | 0.47        |
| VC2507  | 2.28        |
| VC2543  | 0.15        |
| VC2544  | 0.24        |
| VC2546  | 3.67        |
| VC2548  | 2.10        |
| VC2558  | 2.66        |
| VC2559  | 4.15        |
| VC2568  | 2.21        |
| VC2585  | 2.18        |
| VC2586  | 2.33        |
| VC2602  | 2.49        |
| VC2603  | 0.44        |
| VC2604  | 2.00        |
| VC2605  | 2.91        |
| VC2610  | 2.07        |
| VC2618  | 0.46        |
| VC2622  | 2.14        |
| VC2626  | 2.08        |
| VC2628  | 2.37        |
| VC2644  | 0.30        |
| VC2647  | 2.86        |
| VC2648  | 2.23        |
| VC2654  | 2.70        |
| VC2657  | 0.28        |

| Gene ID | Fold Change |
|---------|-------------|
| VC2658  | 0.14        |
| VC2659  | 0.03        |
| VC2663  | 2.23        |
| VC2664  | 2.88        |
| VC2665  | 4.01        |
| VC2666  | 2.11        |
| VC2667  | 8.00        |
| VC2679  | 2.47        |
| VC2695  | 2.06        |
| VC2698  | 0.06        |
| VC2702  | 0.26        |
| VC2704  | 0.09        |
| VC2705  | 0.21        |
| VC2708  | 3.85        |
| VC2709  | 2.15        |
| VC2738  | 0.18        |
| VC2744  | 2.68        |
| VC2746  | 2.99        |
| VC2749  | 0.39        |
| VC2753  | 6.22        |
| VC2758  | 0.32        |
| VC2761  | 0.28        |
| VC2763  | 0.25        |
| VC2764  | 0.39        |
| VC2765  | 0.29        |
| VC2766  | 0.27        |
| VC2767  | 0.28        |
| VC2768  | 0.31        |
| VC2769  | 0.27        |
| VC2770  | 0.38        |
| VC2772  | 0.39        |
| VC2773  | 0.38        |
| VCA0005 | 2.86        |
| VCA0012 | 2.56        |
| VCA0014 | 0.30        |
| VCA0016 | 0.09        |
| VCA0017 | 0.39        |
| VCA0025 | 0.31        |
| VCA0031 | 0.29        |
| VCA0032 | 0.43        |
| VCA0037 | 0.24        |
| VCA0055 | 2.37        |
| VCA0062 | 5.87        |
| VCA0075 | 7.62        |
| VCA0083 | 2.90        |
| VCA0087 | 38.28       |
| VCA0091 | 2.80        |

| Gene ID | Fold Change |
|---------|-------------|
| VCA0124 | 2.23        |
| VCA0125 | 3.57        |
| VCA0130 | 0.18        |
| VCA0141 | 0.19        |
| VCA0152 | 0.31        |
| VCA0154 | 0.46        |
| VCA0161 | 0.02        |
| VCA0166 | 2.32        |
| VCA0167 | 2.48        |
| VCA0186 | 0.39        |
| VCA0189 | 2.26        |
| VCA0190 | 2.20        |
| VCA0198 | 2.62        |
| VCA0205 | 0.49        |
| VCA0223 | 0.15        |
| VCA0225 | 2.45        |
| VCA0227 | 0.30        |
| VCA0231 | 0.23        |
| VCA0244 | 0.40        |
| VCA0274 | 0.44        |
| VCA0278 | 0.47        |
| VCA0280 | 0.37        |
| VCA0281 | 0.14        |
| VCA0286 | 0.49        |
| VCA0292 | 0.24        |
| VCA0298 | 0.39        |
| VCA0300 | 0.48        |
| VCA0308 | 0.44        |
| VCA0310 | 0.46        |
| VCA0314 | 0.48        |
| VCA0317 | 0.21        |
| VCA0322 | 0.38        |
| VCA0328 | 0.46        |
| VCA0330 | 0.42        |
| VCA0337 | 0.34        |
| VCA0345 | 0.22        |
| VCA0350 | 0.33        |
| VCA0358 | 0.40        |
| VCA0362 | 8.70        |
| VCA0367 | 0.50        |
| VCA0378 | 0.44        |
| VCA0381 | 0.48        |
| VCA0384 | 0.50        |
| VCA0395 | 0.19        |
| VCA0406 | 0.17        |
| VCA0410 | 0.43        |
| VCA0412 | 0.45        |

| Gene ID | Fold Change |
|---------|-------------|
| VCA0414 | 0.43        |
| VCA0433 | 2.06        |
| VCA0435 | 0.48        |
| VCA0436 | 0.39        |
| VCA0439 | 0.49        |
| VCA0446 | 2.06        |
| VCA0448 | 0.23        |
| VCA0492 | 0.22        |
| VCA0493 | 2.03        |
| VCA0494 | 0.34        |
| VCA0511 | 0.33        |
| VCA0516 | 0.50        |
| VCA0522 | 0.44        |
| VCA0523 | 0.35        |
| VCA0525 | 7.40        |
| VCA0533 | 2.38        |
| VCA0537 | 0.41        |
| VCA0539 | 0.43        |
| VCA0545 | 2.10        |
| VCA0546 | 2.85        |
| VCA0547 | 0.20        |
| VCA0558 | 0.18        |
| VCA0573 | 0.35        |
| VCA0574 | 0.12        |
| VCA0591 | 0.41        |
| VCA0594 | 0.14        |
| VCA0609 | 0.19        |
| VCA0610 | 0.38        |
| VCA0616 | 3.23        |
| VCA0623 | 0.27        |
| VCA0625 | 0.40        |
| VCA0628 | 0.12        |
| VCA0630 | 0.50        |
| VCA0633 | 2.08        |
| VCA0639 | 0.26        |
| VCA0644 | 0.43        |
| VCA0660 | 2.16        |
| VCA0678 | 0.42        |
| VCA0685 | 0.05        |
| VCA0686 | 0.40        |
| VCA0687 | 0.42        |
| VCA0688 | 0.04        |
| VCA0689 | 0.01        |
| VCA0690 | 0.01        |

| Gene ID | Fold Change |
|---------|-------------|
| VCA0691 | 0.01        |
| VCA0697 | 0.11        |
| VCA0698 | 0.16        |
| VCA0699 | 0.38        |
| VCA0702 | 0.46        |
| VCA0721 | 3.93        |
| VCA0722 | 3.69        |
| VCA0728 | 0.42        |
| VCA0730 | 0.33        |
| VCA0732 | 2.30        |
| VCA0736 | 0.21        |
| VCA0757 | 0.42        |
| VCA0758 | 0.44        |
| VCA0759 | 0.19        |
| VCA0760 | 0.31        |
| VCA0764 | 3.12        |
| VCA0765 | 2.49        |
| VCA0768 | 2.63        |
| VCA0769 | 5.94        |
| VCA0770 | 6.72        |
| VCA0771 | 8.05        |
| VCA0774 | 0.34        |
| VCA0793 | 2.51        |
| VCA0796 | 2.25        |
| VCA0798 | 0.14        |
| VCA0799 | 3.73        |
| VCA0801 | 10.09       |
| VCA0804 | 4.87        |
| VCA0805 | 2.14        |
| VCA0812 | 0.41        |
| VCA0826 | 2.11        |
| VCA0839 | 0.34        |
| VCA0840 | 3.04        |
| VCA0843 | 0.45        |
| VCA0849 | 2.86        |
| VCA0860 | 0.33        |
| VCA0866 | 0.31        |
| VCA0877 | 0.20        |
| VCA0878 | 0.15        |
| VCA0879 | 0.41        |
| VCA0880 | 0.39        |
| VCA0881 | 0.11        |
| VCA0882 | 0.13        |
| VCA0883 | 0.05        |

| Gene ID | Fold Change |
|---------|-------------|
| VCA0884 | 0.44        |
| VCA0886 | 0.42        |
| VCA0892 | 0.10        |
| VCA0896 | 3.10        |
| VCA0897 | 2.93        |
| VCA0908 | 0.16        |
| VCA0916 | 0.33        |
| VCA0917 | 0.29        |
| VCA0918 | 0.13        |
| VCA0922 | 2.67        |
| VCA0923 | 2.25        |
| VCA0925 | 2.17        |
| VCA0945 | 0.15        |
| VCA0952 | 48.70       |
| VCA0957 | 0.32        |
| VCA0969 | 2.18        |
| VCA0970 | 2.68        |
| VCA0980 | 0.35        |
| VCA0986 | 0.46        |
| VCA0994 | 0.35        |
| VCA1004 | 0.14        |
| VCA1021 | 2.32        |
| VCA1022 | 2.02        |
| VCA1027 | 0.18        |
| VCA1028 | 0.49        |
| VCA1033 | 0.21        |
| VCA1034 | 0.17        |
| VCA1041 | 0.36        |
| VCA1043 | 0.47        |
| VCA1044 | 0.19        |
| VCA1046 | 0.27        |
| VCA1050 | 0.34        |
| VCA1065 | 0.19        |
| VCA1069 | 0.13        |
| VCA1071 | 0.11        |
| VCA1072 | 0.08        |
| VCA1073 | 0.07        |
| VCA1075 | 0.36        |
| VCA1076 | 0.33        |
| VCA1085 | 0.32        |
| VCA1113 | 0.19        |
